# Supplementary material for: Characterization and diagnostic application of genomic NPM-ALK fusion sequences in anaplastic large-cell lymphoma
Source: PubMed Central journal article supplement (PMC5995187; doi:10.18632/oncotarget.25489), 2018-05-29
Supplement: oncotarget-09-26543-s001.pdf [file oncotarget-09-26543-s001.pdf]

## **Characterization and diagnostic application of genomic *NPM-ALK* fusion sequences in anaplastic large-cell lymphoma**

### **SUPPLEMENTARY MATERIALS**

**Supplementary Table 1: Monitoring of *NPM-ALK* fusion RNA, DNA and ctDNA levels in 8 ALCL patients during the treatment course**

See Supplementary File 1

**Supplementary Table 2: Sequences of primers used in nested multiplex PCR assay**

|             |          | Primer    | Sequence 5'-3'                 |
|-------------|----------|-----------|--------------------------------|
| <i>NPM</i>  | external | NPM_fw_1  | acatgggggcttctgctgctactttatc   |
|             | internal | NPM_fw_2  | atcagaggtggaaaaacaggtcactgg    |
| <i>ATIC</i> | external | ATIC_fw_1 | agccaccacatagcactgaatagtgaggag |
|             | internal | ATIC_fw_2 | ttgctgtggacgtagaaaaccatctgtc   |
| <i>TPM3</i> | external | TPM3_fw_1 | tggaccattcagcacatttagtcaagag   |
|             | internal | TPM3_fw_2 | gggggtattgcctgtgtgactaatttctac |
|             | external | TPM3_fw_3 | ttggagggaagaagacggttagtagttc   |
|             | internal | TPM3_fw_4 | tggatgcttctagtggttttcaacagag   |
| <i>ALK</i>  | external | ALK_rv_1  | gttctggtggtgaattgctgcagag      |
|             | internal | ALK_rv_2  | ttgctgcagagcagagagggatgaac     |
|             | external | ALK_rv_3  | gaggaggtcttgccagcaaagcagtag    |
|             | internal | ALK_rv_4  | agttgggggttagtcgggtcatgatgg    |
|             | external | ALK_rv_5  | tagggcagagtcagttagtctggttctc   |
|             | internal | ALK_rv_6  | gaagcagactggagatgggattagacc    |
|             | external | ALK_rv_7  | catgtgaggatgttctggaaggcaactc   |
|             | internal | ALK_rv_8  | gaaggcaactccatggaagccagaac     |
|             | external | ALK_rv_9  | ccttggtcacaggctgaacagaaatac    |
|             | internal | ALK_rv_10 | aaccgatttctatctctctgctggag     |

**Supplementary Table 3: Sequences of primers and probes used in ddPCR for quantification of the genomic *NPM-ALK* fusion sequence**

|                              |                |                                             |
|------------------------------|----------------|---------------------------------------------|
| <b>UPN12</b>                 | forward primer | 5'-AAGTCTCAGTTTTTAGAGTATTTACTATCAGTG-3'     |
|                              | probe          | 5'-ATTGGTGAGTGCACAGAGCCCCAG-3'              |
|                              | reverse primer | 5'-ACTATTCAGTCCTGCCTTCCTG-3'                |
| <b>UPN15</b>                 | forward primer | 5'-CTCATTATAACGGCTGGAGTGC-3'                |
|                              | probe          | 5'-CCCGTGTGTATCCTCCTGGCTGATC-3'             |
|                              | reverse primer | 5'-TGTGGGAGCTAGAAGTGACG-3'                  |
| <b>UPN26</b>                 | forward primer | 5'-AAGTCTCAGTTTTTAGAGTATTTACTATCAGTG-3'     |
|                              | probe          | 5'-TTCTTTTCCCAACCTTCCCCCAC-3'               |
|                              | reverse primer | 5'-GCTGAGGTGCAGAATCAGG-3'                   |
| <b>UPN35</b>                 | forward primer | 5'-CTCATTATAACGGCTGGAGTGC-3'                |
|                              | probe          | 5'-CATAGCTTGCTATATCGAAAATCTGCAGACCATATTG-3' |
|                              | reverse primer | 5'-GGCAGAGTCATGTTAGTCTGGTTC-3'              |
| <b>UPN41</b>                 | forward primer | 5'-CTCATTATAACGGCTGGAGTGC-3'                |
|                              | probe          | 5'-ACTCAGAAACCGATTATGATCACATCACTGCA-3'      |
|                              | reverse primer | 5'-TCAGCTCACCTTGGCTCAC-3'                   |
| <b>UPN43</b>                 | forward primer | 5'-TGTATATGTGCAGATGGGGTCTC-3'               |
|                              | probe          | 5'-ATGTTGCCAGATTGGTGCCATCCCT-3'             |
|                              | reverse primer | 5'-GCACGTAGTAACCATGCAACAAG-3'               |
| <b>UPN44</b>                 | forward primer | 5'-GCTTGGTTCAGTTTGGAC-3'                    |
|                              | probe          | 5'-CTCTCAAGAGCCTTCCCGTACTATACCCATG-3'       |
|                              | reverse primer | 5'-TCTACCGGCAGATCCCTTG-3'                   |
| <b>UPN45</b>                 | forward primer | 5'-CTTGCTGCTTGAGTTTTATAATGTC-3'             |
|                              | probe          | 5'-TTAAAGAAGGTGTGTCTTTTCCCTCCACAGCTAAAA-3'  |
|                              | reverse primer | 5'-AGCTCTGAACCTTCCATCATAAC-3'               |
| <b>Karpas 299</b>            | forward primer | 5'-gcctcccaagtgagattac-3'                   |
|                              | probe          | 5'-cctccccggccAAGCCAAAAC-3'                 |
|                              | reverse primer | 5'-GCTGAGGTGCAGAATCAGG-3'                   |
| <b>SR-786</b>                | forward primer | 5'-GAACTCCTGGCCTTAACGTG-3'                  |
|                              | probe          | 5'-ACGCCCTGGCGGCTCCAGAA-3'                  |
|                              | reverse primer | 5'-GAAGGTTGGGTGGAAGCAC-3'                   |
| <b>human albumin control</b> | forward primer | 5'-TGAAACATACGTTCCCAAAGAGTTT-3'             |
|                              | probe          | 5'-TGCTGAAACATTCACCTTCCATGCAGA-3'           |
|                              | reverse primer | 5'-CTCTCCTTCTCAGAAAGTGTGCATAT-3'            |
